# Supplementary material for: Reconstruction of gene innovation associated with major evolutionary transitions in the kingdom Fungi
Source: PubMed Central journal article supplement (PMC9202105; doi:10.1186/s12915-022-01346-8), 2022-06-15
Supplement: 12915_2022_1346_MOESM1_ESM.pdf [file 12915_2022_1346_MOESM1_ESM.pdf]

**Reconstruction of gene innovation associated with major evolutionary transitions in the  
kingdom Fungi**

Baojun Wu<sup>1\*</sup>, Weilong Hao<sup>2</sup>, Murray P. Cox<sup>1\*</sup>

<sup>1</sup> School of Natural Sciences, Massey University, Palmerston North 4410, New Zealand

<sup>2</sup> Department of Biological Sciences, Wayne State University, Detroit, MI, USA

\* Corresponding Authors:

Murray Cox, School of Natural Sciences, Massey University, Palmerston North 4410, New Zealand.

Email: [m.p.cox@massey.ac.nz](mailto:m.p.cox@massey.ac.nz); Phone: +64 6 951 7747

ORCID ID: [orcid.org/0000-0003-1936-0236](https://orcid.org/0000-0003-1936-0236)

Baojun Wu, School of Natural Sciences, Massey University, Palmerston North 4410, New Zealand.

[baojun.edison.wu@gmail.com](mailto:baojun.edison.wu@gmail.com)

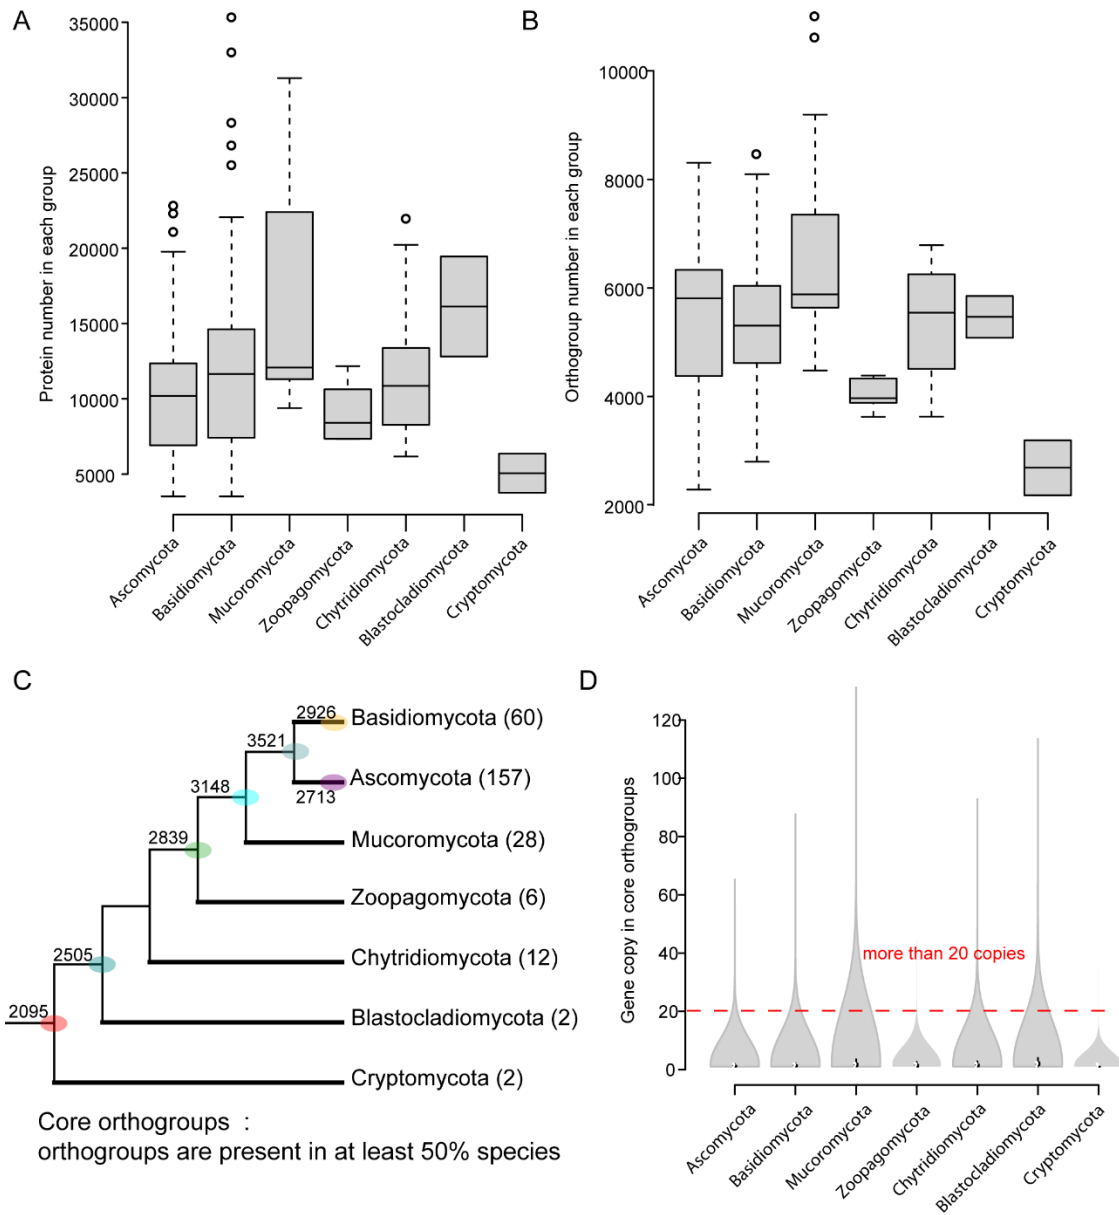

**Figure S1. Protein number (A), orthogroup number (B), core orthogroup number (C) and copy number (D).** Protein number and orthogroup number are shown for each phylum; core orthogroup number refers to orthogroups that are present in at least 50% of species after their emergence; copy number is the protein number in each core orthogroup.

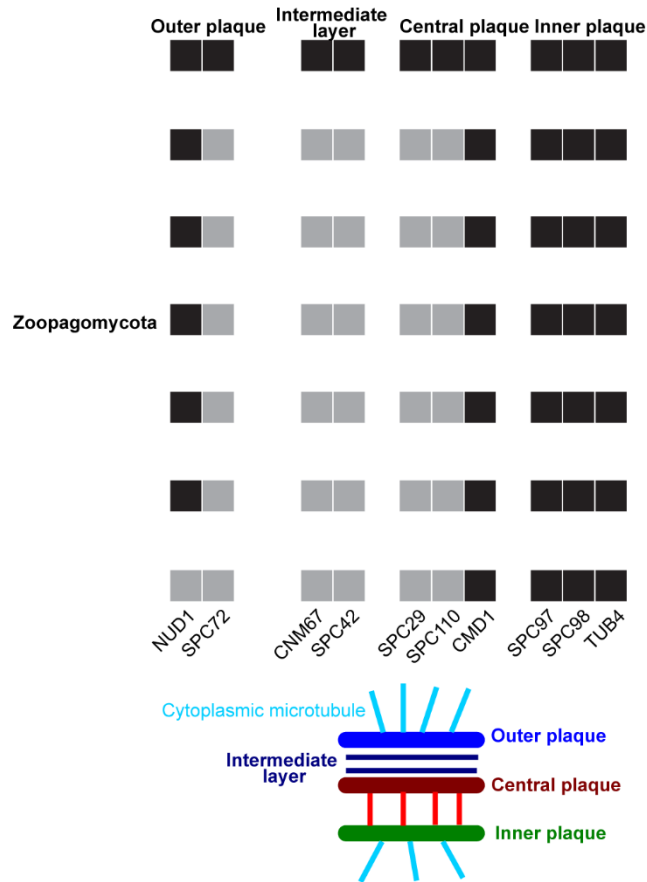

**Figure S2. Distribution of proteins involved in formation of the spindle pole body.** Black boxes represent “presence”; gray boxes represent “absence”.

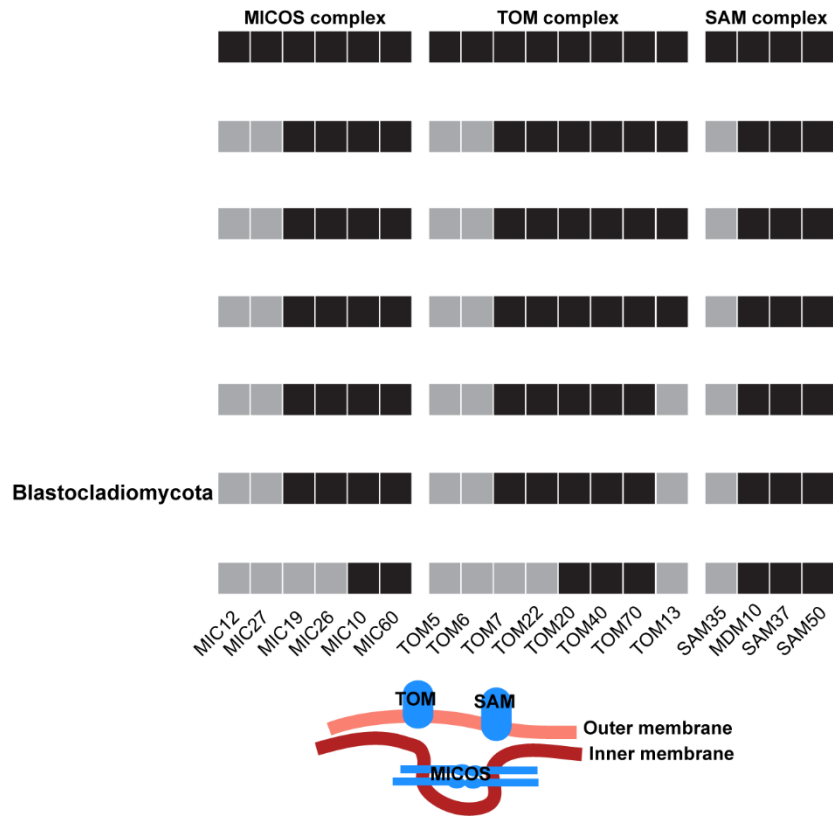

**Figure S3. Distribution of proteins involved in three mitochondrial ultrastructure complexes.** Black boxes represent “presence”; gray boxes represent “absence”.

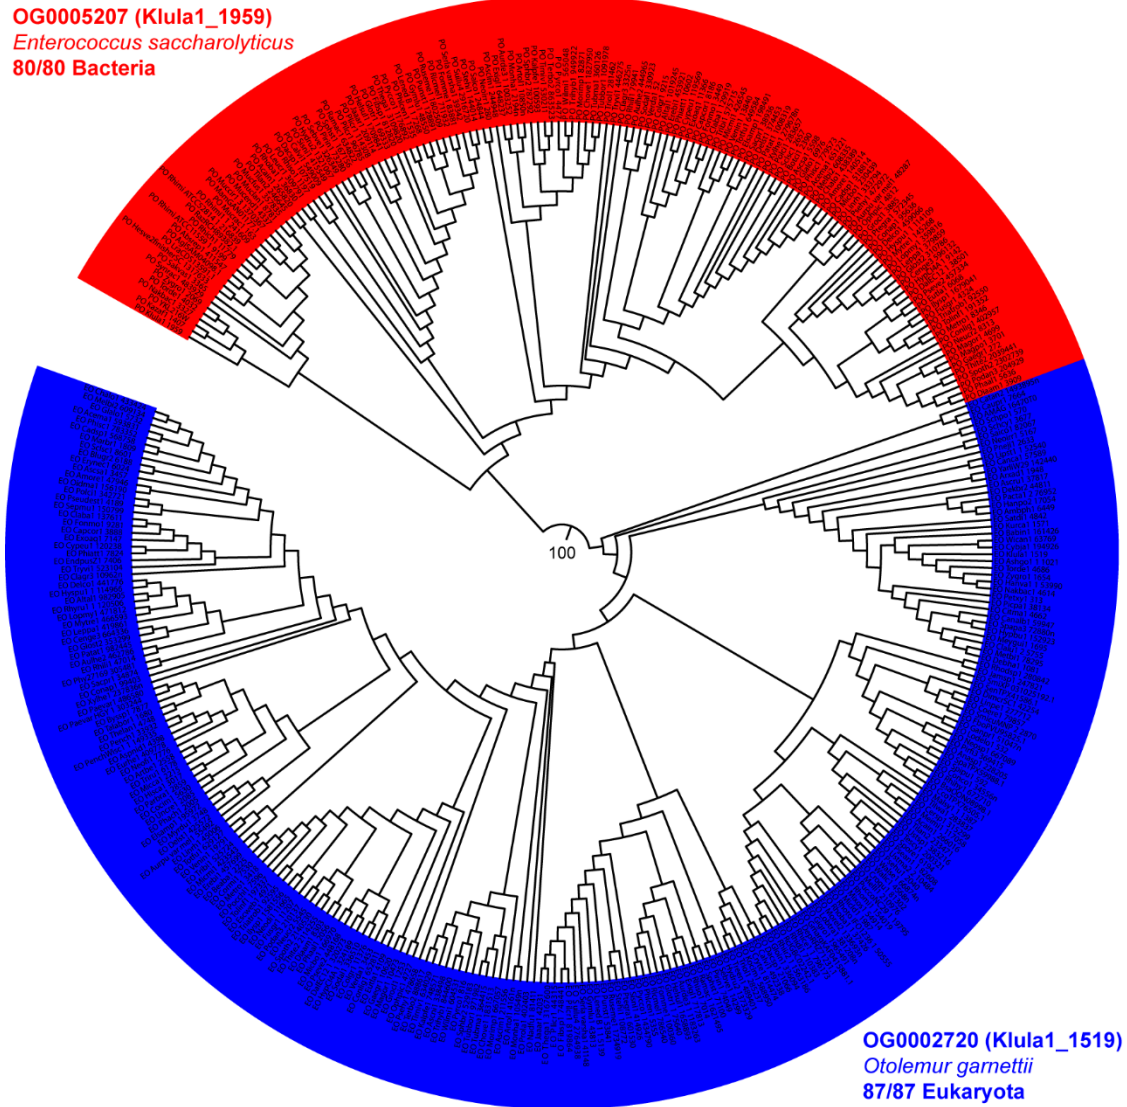

**Figure S4. Maximum likelihood tree of 382 fungal dihydroorotate dehydrogenases (142 prokaryotic origin and 240 eukaryotic origin).** The tree is midpoint rooted. Klula1\_1519 and Klula1\_1959 were used to determine the origin of each orthogroup. The best hit and frequency of organisms among the top 100 best hits are also shown.
